# Supplementary material for: Berberine-induced TFEB deacetylation by SIRT1 promotes autophagy in peritoneal macrophages
Source: publisher site journal article supplement (doi:10.18632/aging.202566), 2021-02-26
Supplement: Supplementary file [file aging-v13i5-202566-supplementary-material-SD1.pdf]

SUPPLEMENTARY FIGURES

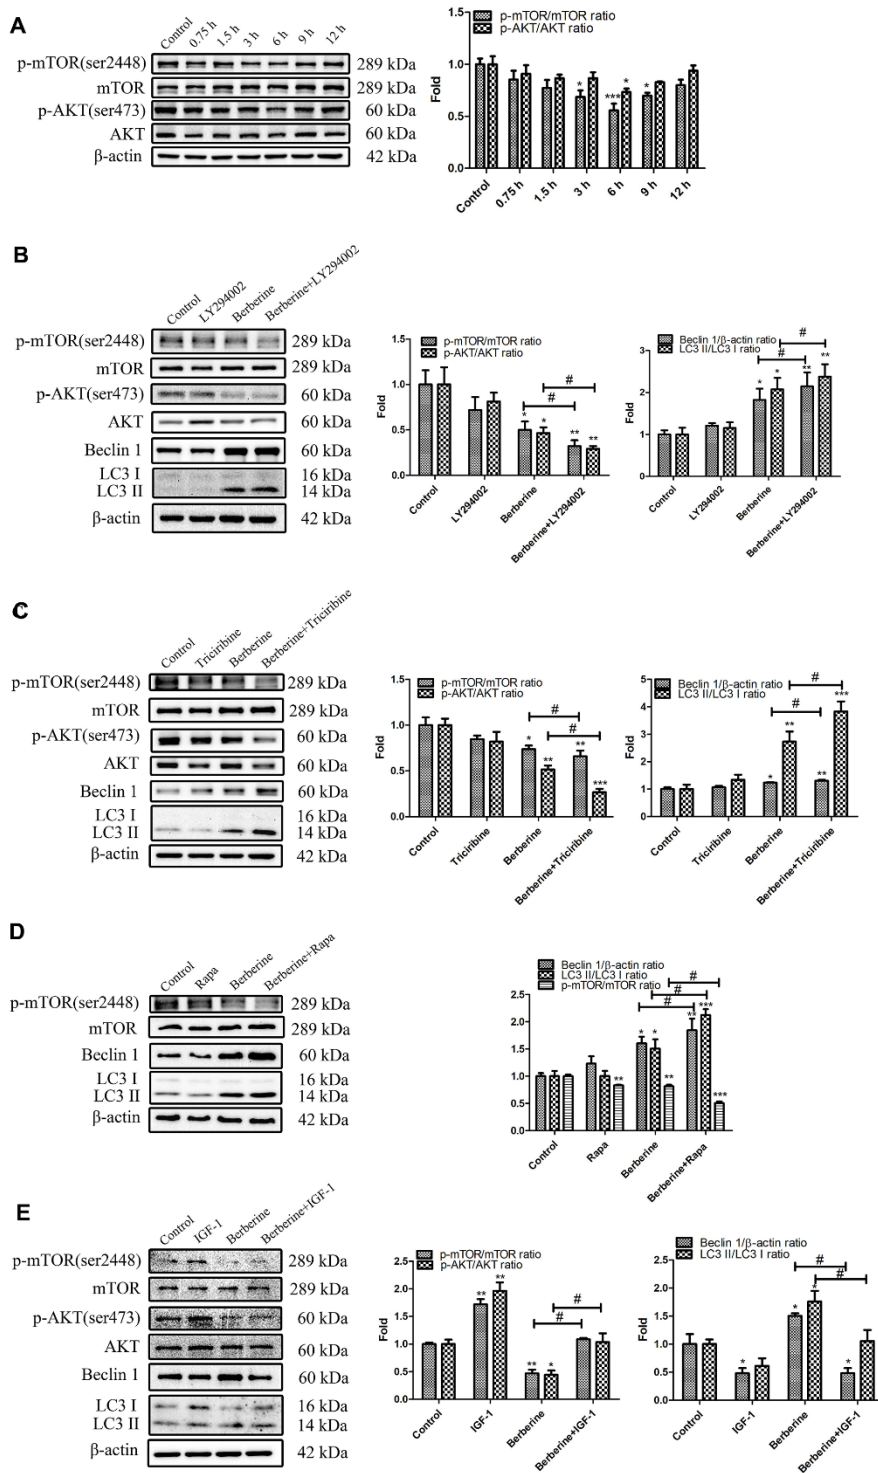

**Supplementary Figure 1. The PI3K/AKT/mTOR signaling pathway is involved in berberine-induced autophagy in peritoneal macrophages.** (A) The expression of mTOR, p-mTOR (Ser 2448), AKT, and p-AKT (Ser 473) was analyzed by western blotting at different time points after treatment with berberine. Quantification of the p-mTOR/mTOR ratio and p-AKT/AKT ratio is shown. Data was analyzed by one-way ANOVA with Tukey HSD post-hoc test (vs. Control group). Analysis of variance and Student-Newman-Keuls post hoc tests were used to compare two group (vs. berberine group). (B) The effect of LY294002 on the expression of mTOR, p-mTOR (Ser 2448), AKT, p-AKT (Ser 473), LC3 I, LC3 II, and Beclin 1 at 6 h after treatment with berberine. Quantification of proteins is shown. Data was analyzed by one-way ANOVA

with Tukey HSD post-hoc test (vs. Control group). Analysis of variance and Student-Newman-Keuls post hoc tests were used to compare two group (vs. berberine group). (C) The effect of triciribine on the expression of mTOR, p-mTOR (Ser 2448), AKT, p-AKT (Ser 473), LC3 I, LC3 II, and Beclin 1 at 6 h after treatment with berberine. Quantification of proteins is shown. Data was analyzed by one-way ANOVA with Tukey HSD post-hoc test (vs. Control group). Analysis of variance and Student-Newman-Keuls post hoc tests were used to compare two group (vs. berberine group). (D) The effect of rapamycin on the expression mTOR, p-mTOR (Ser 2448), LC3 I, LC3 II, and Beclin 1 at 6 h after treatment with berberine. Quantification of proteins is shown. Data was analyzed by one-way ANOVA with Tukey HSD post-hoc test (vs. Control group). Analysis of variance and Student-Newman-Keuls post hoc tests were used to compare two group (vs. berberine group). (E) The effect of IGF-1 on the expression of mTOR, p-mTOR (Ser 2448), AKT, p-AKT (Ser 473), LC3 I, LC3 II, and Beclin 1 at 6 h after treatment with berberine. Quantifications of proteins is shown. Data was analyzed by one-way ANOVA with Tukey HSD post-hoc test (vs. Control group). Analysis of variance and Student-Newman-Keuls post hoc tests were used to compare two group (vs. berberine group). All values are expressed as mean  $\pm$  SD (error bars) of three independent experiments.  $n = 3$ ; \* $p < 0.05$ , \*\* $p < 0.01$ , and \*\*\* $p < 0.001$  versus control. # $p < 0.05$  versus berberine group.

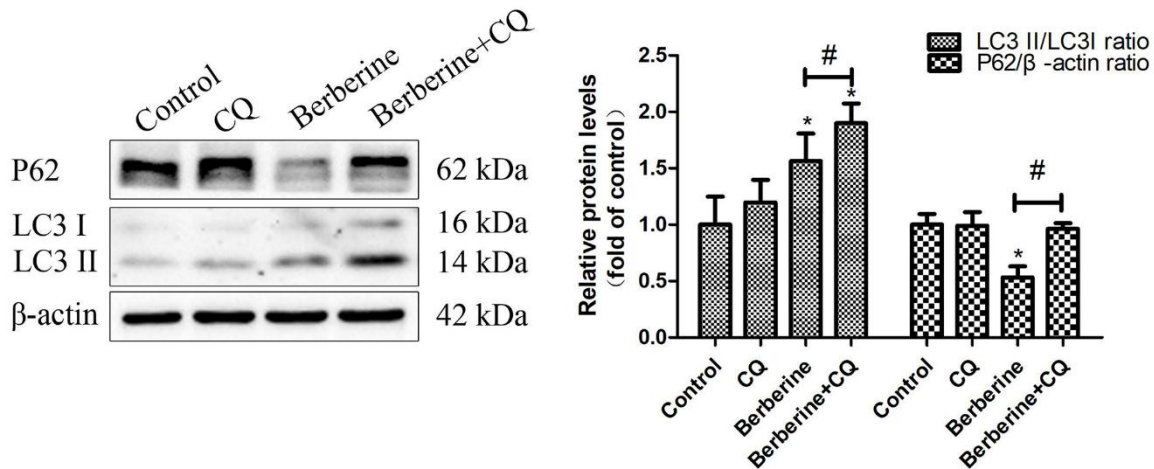

**Supplementary Figure 2. The effect of CQ on autophagy induced by berberine.** The expression levels of P62, LC3 I, LC3 II protein at 6 h after treating with berberine, and quantifications of the proteins above were shown. Data was analyzed by one-way ANOVA with Tukey HSD post-hoc test (vs. Control group). Analysis of variance and Student-Newman-Keuls post hoc tests were used to compare two group (vs. berberine group). All data are mean  $\pm$  standard deviation.  $n = 3$ ; \* $p < 0.05$  versus control. # $p < 0.05$  versus berberine group.

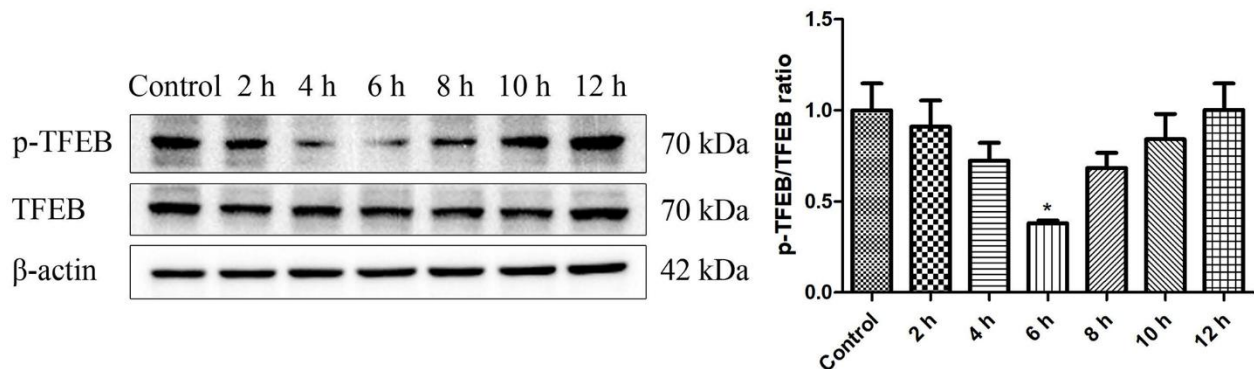

**Supplementary Figure 3. Berberine-induced TFEB dephosphorylation in different time points.** Data was analyzed by one-way ANOVA with Tukey HSD post-hoc test (vs. Control group). All data are mean  $\pm$  standard deviation.  $n = 3$ ; \* $p < 0.05$  versus control.

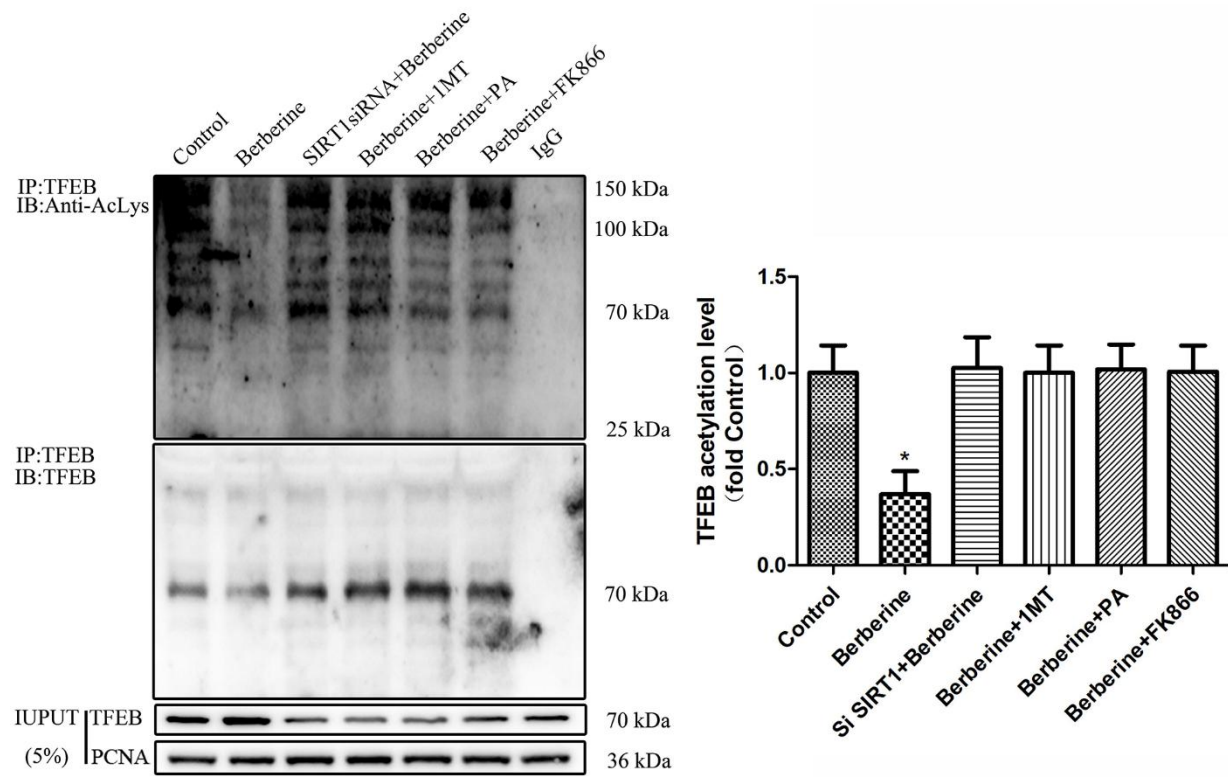

**Supplementary Figure 4. TFEB acetylation level in different treatments for 6 h.** Data was analyzed by one-way ANOVA with Tukey HSD post-hoc test (vs. Control group). All data are mean  $\pm$  standard deviation.  $n = 3$ ; \* $p < 0.05$  versus control.
